# Supplementary material for: Exploring how members of the public access and use health research and information: a scoping review
Source: BMC Public Health. 2023 Nov 7;23:2179. doi: 10.1186/s12889-023-16918-8 (PMC10629152; doi:10.1186/s12889-023-16918-8)
Supplement: Supplementary file 1 — Additional file 1: [file 12889_2023_16918_MOESM1_ESM.xlsx]

## Sheet: Sheet1
Data Extraction Tool
Author(s)	Date	Title	Journal	Study type (e.g. research, review)	Methodology	Intervention or specific product evaluation? Y/N	If intervention / product evaluation add detail	Participant numbers	Participant characteristics	Participant Geographical location	Reasons / purpose for accessing HRI	Communication tool used for accessing HRI	Format of HRI accessed	Use of HRI	Condition/ aspect of health or healthcare accessed	Factors facilitating access/barriers to accessing/using HRI	Study conclusions	Author recommendations	Notes
